# Supplementary material
Source: publisher figshare collection journal article supplement (https://karger.figshare.com/articles/dataset/_/5882290)
Supplement: Supplementary file 1 [file 1]

**Table S1. Primers used in the isolation of chromosome-specific markers.**

| Mega-scaffold | BACs/PCR products | scaffold-Genome-primer | Primer sequence              | Product size (bp) |
|---------------|-------------------|------------------------|------------------------------|-------------------|
| 1             | 21A03             | 1-TFL2-F               | TGAACAAGTGAAGCCAGACA         | 501               |
|               |                   | 1-TFL2-R               | CCCCTGCCTAGATAATTGGT         |                   |
| 2             | Sc-02             | Lotus2-3F              | GACTGCCAACCAACCGACACTCTGC    | 4561              |
|               |                   | Lotus2-3R              | AACACCCACAACCCATAACCCTCCC    |                   |
|               |                   | Lotus2-4F              | CCATATTTTTGTCTAAAGCAACCCA    | 5404              |
|               |                   | Lotus2-4R              | CTACAAGCCATCATTCCTAACCTATT   |                   |
|               |                   | Lotus2-5F              | CCATACCCGAGTTTAACCA          | 3009              |
|               |                   | Lotus2-5R              | AGAACTTAGCAGACAGAGGACG       |                   |
|               |                   | Lotus2-6F              | TTGTGGGGAGGGATACTACTTA       | 5030              |
|               |                   | Lotus2-6R              | ACTGCTCCAGAAAATGACACC        |                   |
| 3             | 10E06             | 3-VTC-F                | CAAGTGGCTCAGTTTCTCGT         | 474               |
|               |                   | 3-VTC-R                | ACTGCTTGGTGCTTAAGTGG         |                   |
| 4             | 06A17             | 4-PMI1-F               | TGTTTCAGACGGGTTTTCAAT        | 557               |
|               |                   | 4-PMI1-R               | CAGAATACAACCTGGCCCATC        |                   |
| 5             | 22O22             | 5-FY-F                 | CTAGGGGTGGGAAAAGACAT         | 537               |
|               |                   | 5-FY-R                 | TGGTAAGCACCCAACAAAAT         |                   |
| 6             | 02B06             | 6-WC-X-F               | CCAAGGGTTAGATCCGAGTT         | 550               |
|               |                   | 6-WC-X-R               | TAGGCAACTAGGCAACAAGG         |                   |
| 7             | Sc-07             | Lotus7-1F              | TCATCCTTGAAACTTCCAAACGCTAC   | 4126              |
|               |                   | Lotus7-1R              | TTTTGACAGGTCAGGGTCCAATACA    |                   |
|               |                   | Lotus7-2F              | AGACGAAGGCAGAACAACCAGACG     | 6128              |
|               |                   | Lotus7-2R              | ACGAAATGAAGACAGAAACCGAAAG    |                   |
|               |                   | Lotus7-4F              | ATGACTAATGAGCAAGTAGCCCT      | 4745              |
|               |                   | Lotus7-4R              | ACAGGAGCAGAGTTACCAGACC       |                   |
|               |                   | Lotus7-5F              | CCTAGAGGCTTTACATACGTTGC      | 5161              |
|               |                   | Lotus7-5R              | CCCATTTCGGAGTCCTAACAA        |                   |
| 8             | Sc-08             | Lotus8-F               | TGGAAGACACTGGCAAGATAGA       | 4613              |
|               |                   | Lotus8-R               | GCCTCACCCATAGTTGTCAAG        |                   |
|               |                   | Lotus8-1-F             | GTGGAACGTGGAAGACGATAG        | 5035              |
|               |                   | Lotus8-1-R             | ACAAGGTGACAAAAGTATCTAGGAC    |                   |
|               |                   | Lotus8-2-F             | CATGCAGCAATCTTCAACCCTA       | 5536              |
|               |                   | Lotus8-2-R             | GTCCCACCTAACCCAAAATACG       |                   |
| 9             | Sc-09             | Lotus9-1F              | GAATAGGTTCCAGTTTGTGC         | 4392              |
|               |                   | Lotus9-1R              | CTCCCCATAGGTTGATAGAT         |                   |
|               |                   | Lotus9-2F              | GTCCGGCACAGTCATGTCTAC        | 3486              |
|               |                   | Lotus9-2R              | TTGCAGGATGAGTGGGTTTAA        |                   |
| 10            | Sc-10             | Lotus10-1F             | ATTTTCGGTCGGTTCAGTTTGCT      | 3317              |
|               |                   | Lotus10-1R             | TTTTAGGGAGGGACTCACCACC       |                   |
|               |                   | Lotus10-2F             | CACGCCTGACTGAAAACCTTGA       | 3789              |
|               |                   | Lotus10-2R             | GCCTTGTTTCGTTTATTGGTATG      |                   |
|               |                   | Lotus10-3F             | TCATCCTACTTATTTCTGAGACGCCTAC | 3810              |
|               |                   | Lotus10-3R             | AAAACCACCCTTGCCCCACTAT       |                   |

**Table S2. Karyotyping of the mitotic chromosomes in JianXuan 17.**

| Chr. | Short arm<br>( $\mu\text{m}$ ) | Long arm<br>( $\mu\text{m}$ ) | Arm ratio       | Location of<br>45S DNA | Location of<br>5S DNA | Total Length<br>( $\mu\text{m}$ ) | Relative length<br>(%) |
|------|--------------------------------|-------------------------------|-----------------|------------------------|-----------------------|-----------------------------------|------------------------|
| 1    | 0.98 $\pm$ 0.09                | 3.57 $\pm$ 0.20               | 3.67 $\pm$ 0.35 |                        |                       | 4.54 $\pm$ 0.23                   | 23.66 $\pm$ 1.22       |
| 2    | 1.79 $\pm$ 0.23                | 0.84 $\pm$ 0.10               | 2.15 $\pm$ 0.37 | Short arm              |                       | 2.62 $\pm$ 0.25                   | 13.67 $\pm$ 1.32       |
| 3    | 0.69 $\pm$ 0.07                | 1.92 $\pm$ 0.11               | 2.81 $\pm$ 0.30 | Long arm               |                       | 2.60 $\pm$ 0.14                   | 13.56 $\pm$ 0.71       |
| 4    | 1.47 $\pm$ 0.17                | 0.81 $\pm$ 0.14               | 1.87 $\pm$ 0.50 | Short arm              |                       | 2.28 $\pm$ 0.20                   | 11.87 $\pm$ 1.06       |
| 5    | 0.95 $\pm$ 0.07                | 1.35 $\pm$ 0.09               | 1.43 $\pm$ 0.13 |                        | Long arm              | 2.29 $\pm$ 0.12                   | 11.94 $\pm$ 0.65       |
| 6    | 0.78 $\pm$ 0.06                | 1.25 $\pm$ 0.08               | 1.61 $\pm$ 0.16 | Long arm               |                       | 2.03 $\pm$ 0.11                   | 10.63 $\pm$ 0.60       |
| 7    | 0.65 $\pm$ 0.06                | 0.86 $\pm$ 0.06               | 1.34 $\pm$ 0.16 |                        |                       | 1.51 $\pm$ 0.08                   | 7.87 $\pm$ 0.43        |
| 8    | 0.56 $\pm$ 0.07                | 0.76 $\pm$ 0.12               | 1.37 $\pm$ 0.21 |                        |                       | 1.32 $\pm$ 0.16                   | 6.85 $\pm$ 0.85        |

**Table S3. Karyotyping of the mitotic chromosomes in DFH.**

| Chr. | Short arm<br>( $\mu\text{m}$ ) | Long arm<br>( $\mu\text{m}$ ) | Arm ratio       | Location of<br>45S DNA | Location of 5S<br>DNA | Total Length<br>( $\mu\text{m}$ ) | Relative length<br>(%) |
|------|--------------------------------|-------------------------------|-----------------|------------------------|-----------------------|-----------------------------------|------------------------|
| 1    | 0.86 $\pm$ 0.11                | 3.70 $\pm$ 0.21               | 4.33 $\pm$ 0.44 |                        |                       | 4.56 $\pm$ 0.29                   | 23.75 $\pm$ 1.50       |
| 2    | 0.88 $\pm$ 0.12                | 1.76 $\pm$ 0.19               | 2.05 $\pm$ 0.47 | Short arm              |                       | 2.65 $\pm$ 0.17                   | 13.78 $\pm$ 0.87       |
| 3    | 0.78 $\pm$ 0.08                | 1.85 $\pm$ 0.17               | 2.39 $\pm$ 0.32 | Long arm               |                       | 2.63 $\pm$ 0.21                   | 13.67 $\pm$ 1.09       |
| 4    | 0.83 $\pm$ 0.11                | 1.47 $\pm$ 0.30               | 1.79 $\pm$ 0.34 | Short arm              |                       | 2.30 $\pm$ 0.36                   | 11.97 $\pm$ 1.87       |
| 5    | 0.80 $\pm$ 0.13                | 1.42 $\pm$ 0.18               | 1.79 $\pm$ 0.27 |                        | Long arm              | 2.22 $\pm$ 0.26                   | 11.55 $\pm$ 1.37       |
| 6    | 0.77 $\pm$ 0.15                | 1.18 $\pm$ 0.13               | 1.59 $\pm$ 0.31 | Long arm               |                       | 1.95 $\pm$ 0.23                   | 10.46 $\pm$ 1.35       |
| 7    | 0.60 $\pm$ 0.08                | 0.93 $\pm$ 0.15               | 1.58 $\pm$ 0.23 |                        |                       | 1.53 $\pm$ 0.19                   | 7.96 $\pm$ 1.01        |
| 8    | 0.57 $\pm$ 0.11                | 0.81 $\pm$ 0.14               | 1.44 $\pm$ 0.22 |                        |                       | 1.38 $\pm$ 0.23                   | 7.18 $\pm$ 1.21        |

**Table S4. Karyotyping of the mitotic chromosomes in Thailand.**

| Chr. | Short arm<br>( $\mu\text{m}$ ) | Long arm<br>( $\mu\text{m}$ ) | Arm ratio       | Location of<br>45S DNA | Location of 5S<br>DNA | Total Length<br>( $\mu\text{m}$ ) | Relative length<br>(%) |
|------|--------------------------------|-------------------------------|-----------------|------------------------|-----------------------|-----------------------------------|------------------------|
| 1    | 0.82 $\pm$ 0.10                | 3.54 $\pm$ 0.27               | 4.36 $\pm$ 0.40 |                        |                       | 4.36 $\pm$ 0.33                   | 23.42 $\pm$ 1.78       |
| 2    | 0.81 $\pm$ 0.13                | 1.81 $\pm$ 0.17               | 2.28 $\pm$ 0.41 | Short arm              |                       | 2.63 $\pm$ 0.23                   | 14.12 $\pm$ 1.21       |
| 3    | 1.76 $\pm$ 0.20                | 0.82 $\pm$ 0.16               | 2.25 $\pm$ 0.57 | Long arm               |                       | 2.58 $\pm$ 0.22                   | 13.88 $\pm$ 1.19       |
| 4    | 0.75 $\pm$ 0.13                | 1.50 $\pm$ 0.25               | 2.04 $\pm$ 0.38 | Short arm              |                       | 2.24 $\pm$ 0.33                   | 12.06 $\pm$ 1.76       |
| 5    | 0.75 $\pm$ 0.10                | 1.45 $\pm$ 0.16               | 1.96 $\pm$ 0.30 |                        | Long arm              | 2.20 $\pm$ 0.21                   | 11.84 $\pm$ 1.14       |
| 6    | 0.69 $\pm$ 0.09                | 1.27 $\pm$ 0.16               | 1.85 $\pm$ 0.32 | Long arm               |                       | 1.96 $\pm$ 0.21                   | 10.51 $\pm$ 1.11       |
| 7    | 0.58 $\pm$ 0.08                | 0.92 $\pm$ 0.17               | 1.60 $\pm$ 0.35 |                        |                       | 1.50 $\pm$ 0.20                   | 8.08 $\pm$ 1.06        |
| 8    | 0.44 $\pm$ 0.10                | 0.69 $\pm$ 0.10               | 1.63 $\pm$ 0.42 |                        |                       | 1.13 $\pm$ 0.17                   | 6.09 $\pm$ 0.92        |

**Table S5. The significant assays (*p* values) of 5S signal gray values among China Antique, JX17, DFH, and Thailand.**

|               | China Antique | JX17    | DFH     | Thailand |
|---------------|---------------|---------|---------|----------|
| China Antique | -             | 3.9E-02 | 2.2E-4  | 7.6E-09  |
| JX17          | -             | -       | 2.9E-02 | 5.5E-07  |
| DFH           | -             | -       | -       | 2.1E-3   |
